# Supplementary material for: Oxidative Stability of Acylated and Hydrogenated Ricinoleates Using Synthetic and Natural Antioxidants
Source: Hindawi journal article supplement (doi:10.1155/2019/3973657), 2019-05-14

**SUPPLEMENTARY MATERIAL**

**CHARACTERIZATION OF BIO-BASED LUBRICANTS SAMPLES:**

**BL1** - 1H NMR (CDCl3, 500 MHz):  5.37-5.34 (m, -CHCH-), 4.78-4.83 (m,-CH**-**OC=O-), 3.95 (d,-OCH2-CH(CH2-)CH2-), 2.2 (s, CH3-(C=O)-O-), 1.65–1.19 (m, -CH2-) and 0.88-0.84 ppm (m, -CH3).

**BL2** - 1H NMR (CDCl3, 500 MHz):  5.35-5.33 (m, -CHCH-), 4.79-4.85 (m, -CH**-**OC=O-), 3.93 (t, -OCH2-CH2-CH2-), 2.21 (s, CH3-(C=O)-O-), 1.61–1.21 (m, -CH2-) and 0.89-0.82 ppm (m, -CH3).

**BL3** - 1H NMR (CDCl3, 500 MHz):  4.91-4.81 (m, -CH**-**OC=O-), 3.92 (d, -OCH**2**-CH(CH2-)CH2-), 2.23 (s, CH3-(C=O)-O-), 1.64–1.25 (m, -CH2-) and 0.92-0.85 ppm (m, -CH3).

**BL4 -**1H NMR (CDCl3, 500 MHz):  4.95-4.82 (m, -CH**-**OC=O-), 3.95 (t, -OCH**2**-CH2-), 2.23 (s, CH3-(C=O)-O-), 1.65–1.18 (m, -CH2-) and 0.91-0.82 ppm (m, -CH3).

**SAMPLES OF MINERAL NAPHTHENIC OIL, CASTOR OIL AND BIO-BASED LUBRICANTS:**


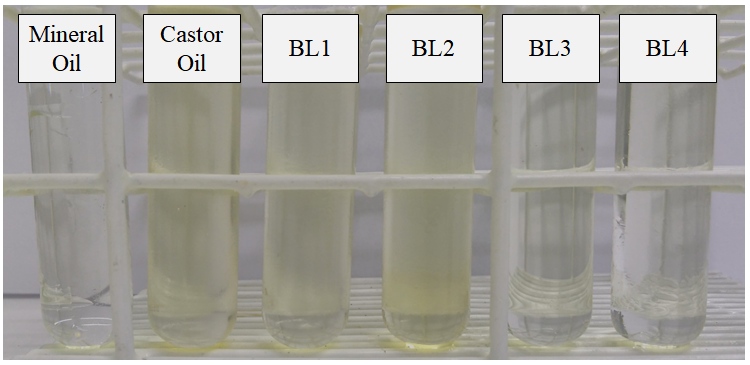


**CHARACTERIZATION OF ANTIOXIDANTS FROM CASHEW NUT SHELL LIQUID:**

**UNSATURATED CARDANOL (U-CDN):** 1H NMR (CDCl3, 500 MHz): 1.05 (t, 3H); 1.36 (2H) 1.48 (m); 1.71 (m,2H); 2.17 (m, 2H); 2.65(t,2H); 2.95 (m,2H); 5.11–5.98; 6.81 (m, 2H); 6.86 (d,1H); 7.22 (t,1H). 13C NMR (CDCl3, 125 MHz): 14.14; 22.79; 25.74; 27.37; 29.12 – 31.94; 35.98; 112.84; 115.63; 120.94; 126.97 – 130.48; 144.89; 155.66. GC–MS (EI): m/z = 302 and 304.

**SATURATED CARDANOL (S-CDN):** 1H NMR (CDCl3, 500 MHz) ıH 1.03 (t, 3H); 1.45 (m); 2.19 (t, 2H); 5.13 (m); 5.21; 5.53 (m); 5.92 (m); 6.79 (m, 1H); 6.82 (m, 1H); 6.86 (s, 1H); 7.22 (t, 1H). 13C NMR (CDCl3, 500 MHz) ıC 13.9, 22.8, 29, 112.92, 115.65, 119.81, 129.47, 144.62, 157.81. GC/MS: m/z = 304 (M+).

**SAMPLES OF BL3 DOPED WITH DBPC (2,6-DITERT-BUTYL-4-METHYLPHENOL), PG (PROPYL 3,4,5-TRIHYDROXYBENZOATE), S-CDN (SATURATED CARDANOL) AND U-CDN (UNSATURATED CARDANOL) AT 5OOO mg/Kg BEFORE THE OXIDATION EXPERIMENTS.**


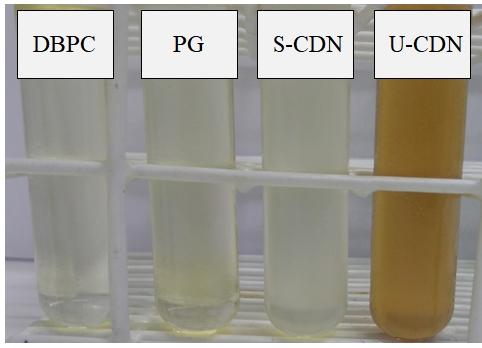

Supplement: f1 [file 3973657.f1.docx]
